# Supplementary material for: Continuous flow asymmetric cyclopropanation reactions using Cu(i) complexes of Pc-L* ligands supported on silica as catalysts with carbon dioxide as a carrier
Source: Royal Society of Chemistry journal article supplement (doi:10.1039/c4gc00119b), 2014-01-01
Supplement: c4gc00119b1.pdf [file c4gc00119b1.pdf]

Supporting Information

## Continuous Flow Asymmetric Cyclopropanation Reactions Using Cu(I) Complexes of Pc-L\* Ligands Supported on Silica as Catalysts with Carbon Dioxide as Carrier.

Brunilde Castano<sup>a</sup>, Emma Gallo<sup>a</sup>, David J. Cole-Hamilton<sup>\*b</sup>, Vladimiro Dal Santo,<sup>c</sup> Rinaldo Psaro<sup>c</sup> and Alessandro Caselli<sup>\*a</sup>.

<sup>a</sup> Dipartimento di Chimica, Università di Milano, and ISTM-CNR; Via Golgi 21, 20133 Milano, Italy. Fax: (+39)02 5031 4405; Tel: (+39)02 5031 4372; E-mail: [alessandro.caselli@unimi.it](mailto:alessandro.caselli@unimi.it)

<sup>b</sup> EaStCHEM, School of Chemistry, University of St. Andrews, St. Andrews, Fife, Scotland, UK, KY16 9ST; E-mail: [djc@st-andrews.ac.uk](mailto:djc@st-andrews.ac.uk)

<sup>c</sup> CNR – Istituto di Scienze e Tecnologie Molecolari, Via C. Golgi 19, 20133 Italy.

### PART I

|                                                                                                     |       |
|-----------------------------------------------------------------------------------------------------|-------|
| General experimental details.                                                                       | p. S2 |
| Grafting of [Cu <sup>I</sup> (Pc-L*)]CF <sub>3</sub> SO <sub>3</sub> complex, <b>1</b> , on silica. | p. S3 |
| Synthesis of <b>1/D</b> .                                                                           | p. S3 |
| Synthesis of <b>1/A</b> .                                                                           | p. S3 |
| Synthesis of <b>1/M</b> .                                                                           | p. S3 |
| Synthesis of <b>2/D</b> .                                                                           | p. S3 |

### PART II

|                                                                                                                                             |        |
|---------------------------------------------------------------------------------------------------------------------------------------------|--------|
| Tables of all collected samples <b>S1a-f</b> .                                                                                              | p. S4  |
| Tables of all collected samples <b>S2a-f</b> .                                                                                              | p. S7  |
| Table of all collected samples <b>S3a</b> .                                                                                                 | p. S11 |
| Tables of all collected samples <b>S4a-e</b> .                                                                                              | p. S11 |
| Table of the blank reaction with bare Davisil under CO <sub>2</sub> .                                                                       | p. S14 |
| Figure <b>S1</b> . Chemoselectivity (%) vs time (minutes) of the cyclopropanation reaction of different alkenes catalysed by <b>2/D</b> .   | p. S15 |
| Figure <b>S2</b> . DRIFT spectra showing the comparison of supported catalyst <b>2/D</b> and free complex <b>2</b> in KBr.                  | p. S15 |
| Figure <b>S3</b> . CO-DRIFT spectra.                                                                                                        | p. S15 |
| Figure <b>S4</b> . DRIFT spectra showing the comparison of catalyst <b>2/D</b> pre- and post-catalysis with different alkenes and EDA.      | p. S16 |
| Figure <b>S5</b> . Spectra in 1,2-DCE of catalyst <b>2</b> with ethyl-fumarate, showing the interaction of this molecule with the catalyst. | p. S16 |
| Figure <b>S6</b> . Spectra in 1,2-DCE of catalyst <b>2</b> with ethyl-maleate, showing the interaction of this molecule with the catalyst.  | p. S16 |
| <sup>1</sup> H NMR and HPLC analysis of selected samples.                                                                                   | p. S17 |
| References.                                                                                                                                 | p. S24 |

**General.** NMR spectra were recorded on Bruker Avance 300-DRX or Avance 400-DRX spectrometers. Chemical shifts (ppm) are reported relative to TMS. Metal loadings are determined by ICP-OES using a Thermo X Series II apparatus. 15 mg of each sample are mineralized by adding 3 mL of 37% HCl, 1 mL of concentrated HNO<sub>3</sub>, 1 mL of 98% H<sub>2</sub>SO<sub>4</sub>. HPLC analyses were performed on a Hewlett-Packard 1050 instrument equipped with DAI-CEL CHIRALCEL, IB, OJ and AD chiral columns. Infrared spectra were recorded on a BIO-RAD FTS-7 spectrophotometer. CO-DRIFT spectra of the samples were recorded using a FTS-60A spectrophotometer equipped with a homemade reaction chamber. After purging the apparatus with ultra-pure He, spectra of the samples were recorded at RT in He and CO flow, before and after catalysis. Elemental analyses and mass spectra were recorded in the analytical laboratories of Milan University. All starting materials ( $\alpha$ -methylstyrene, ethyldiazoacetate (EDA),<sup>1</sup> 2,4-dinitrotoluene, styrene, 4-chlorostyrene, 1,1-diphenylethylene, methyl-2-furoate, 1-octene and 1,2-dichloroethane) were purchased from Aldrich and used without further treatment. Solvents for the analytical HPLC were purchased from Sigma-Aldrich, and used as received. Davisil LC150 (Grace Davison, 35-70 micron) and Aerosil 380 (Evonik) are commercially available. MCM-41 was synthesized as already reported.<sup>2</sup> CO<sub>2</sub> (99.9995%) was purchased from BOC gases. Unless otherwise specified, all the reactions were carried out in air atmosphere. The synthesis and characterization of copper(I)(Pc-L\*) complexes **1**<sup>3</sup> and **2**<sup>4</sup> were previously reported. The water and air sensitive catalysts **1/D**, **1/A**, **1/M** and **2/D** were synthesized as already reported<sup>5</sup> and they were handled in a dry-box, model “Labstar 50” (MBraun, Germany).

The collected analytical data for *cis* and *trans* ethyl-2-methyl-2-phenylcyclopropanecarboxylate,<sup>6</sup> *cis* and *trans* ethyl-2-phenylcyclopropanecarboxylate,<sup>7</sup> *cis* and *trans* ethyl 2-(4-chlorophenyl)cyclopropanecarboxylate,<sup>8</sup> ethyl-2,2-diphenylcyclopropanecarboxylate,<sup>6</sup> dimethyl-2-oxabicyclo[3.1.0]hex-3-ene-3,6-dicarboxylate<sup>9</sup> and *cis* and *trans* ethyl-2-hexylcyclopropanecarboxylate<sup>10</sup> are in agreement with those reported in the literature. The absolute configurations of the product cyclopropanes were assigned based on literature data.

### **Materials.**

**Davisil L150 (Grace Davison, 35-70 micron):** pore diameter 13.3 nm; pore volume 1.1 mL/g; surface area 279 m<sup>2</sup>/g.

**Aerosil 380 (Evonik):** surface area 262 m<sup>2</sup>/g.

**MCM-41 (6170):** pore diameter 3.6 nm; pore volume 0.73 mL/g; surface area 967 m<sup>2</sup>/g.

Activation of all silicas was performed in a Schlenk flask at 300 °C for 2-3 h in air, subsequently in high vacuum (at least  $10^{-5}$  mbar) overnight at 300 °C.

**Grafting of [Cu<sup>I</sup>(Pc-L\*)]CF<sub>3</sub>SO<sub>3</sub> complex, 1, on silica.** Although the general synthesis of these products has already been reported by us,<sup>4</sup> we here report the exact reagent amounts used in the present work.

**Synthesis of 1/D.** [Cu(OTf)<sub>2</sub>·(C<sub>6</sub>H<sub>6</sub>)] (0.140 g, 0.277 mmol) was added to a C<sub>2</sub>H<sub>4</sub>Cl<sub>2</sub> (28 mL) solution of **1** (0.371 g, 0.555 mmol). The resulting colorless solution was stirred for 1 h., then added to activated Davisil B (3.5 g). The mixture was stirred at RT for 4 h under inert atmosphere, filtered, the solid washed with C<sub>2</sub>H<sub>4</sub>Cl<sub>2</sub> (3 x 10 mL) and dried overnight to yield the immobilized copper(I) complex **1/D**. A copper loading of 0.84 % was determined by ICP-OES.

**Synthesis of 1/A.** [Cu(OTf)<sub>2</sub>·(C<sub>6</sub>H<sub>6</sub>)] (0.0411 g, 0.0816 mmol) was added to a C<sub>2</sub>H<sub>4</sub>Cl<sub>2</sub> (8.2 mL) solution of **1** (0.109 g, 0.163 mmol). The resulting colorless solution was stirred for 1 h., then added to activated Aerosil (1.0 g) The mixture was stirred at RT for 4 h under inert atmosphere, filtered, the solid washed with C<sub>2</sub>H<sub>4</sub>Cl<sub>2</sub> (3 x 10 mL) and dried overnight to yield the immobilized copper(I) complex **1/A**. A copper loading of 0.812 % was determined by ICP-OES.

**Synthesis of 1/M.** [Cu(OTf)<sub>2</sub>·(C<sub>6</sub>H<sub>6</sub>)] (0.0568 g, 0.113 mmol) was added to a C<sub>2</sub>H<sub>4</sub>Cl<sub>2</sub> (11 mL) solution of **1** (0.151 g, 0.226 mmol). The resulting colorless solution was stirred for 1 h., then added to activated MCM-41 (1.4 g). The mixture was stirred at RT for 4 h under inert atmosphere, filtered, washed with C<sub>2</sub>H<sub>4</sub>Cl<sub>2</sub> (3 x 10 mL) and dried overnight to yield the immobilized copper(I) complex **1/M**. A copper loading of 0.85 % was determined by ICP-OES.

**Synthesis of 2/D.** Complex **2** (0.410 g, 0.470 mmol) was dissolved in CH<sub>2</sub>Cl<sub>2</sub> (40 mL). The resulting colourless solution was added to activated Davisil LC150 (3.0 g), the mixture was stirred at RT for 4 h under inert atmosphere, filtered, the solid washed with CH<sub>2</sub>Cl<sub>2</sub> (3 x 10 mL) and dried overnight to yield the immobilized copper(I) complex **2/D**.

**Tables of all collected samples S1-S4.**

**Table S1a.** Cyclopropanation with  $\alpha$ -methylstyrene and EDA with **1/D**. (Data referred to Table 2, entry 3, run 1).<sup>a</sup>

| Catalyst<br>(g) | Cu<br>(mmol) | Entry | time<br>(min) | conversion<br>(%) | selectivity<br>(%) | <i>cis:trans</i> | <i>ee</i> (%) <sup>b</sup>              |                                           |
|-----------------|--------------|-------|---------------|-------------------|--------------------|------------------|-----------------------------------------|-------------------------------------------|
|                 |              |       |               |                   |                    |                  | <i>cis</i><br>(1 <i>R</i> ,2 <i>S</i> ) | <i>Trans</i><br>(1 <i>R</i> ,2 <i>R</i> ) |
| 0.4274          | 0.0565       | 1     | 218           | 99                | 65.2               | 58:42            | 38                                      | 18                                        |
|                 |              | 2     | 249           | 99                | 65.7               | 57:43            | 39                                      | 16                                        |
|                 |              | 3     | 280           | 99                | 65.4               | 57:43            | 36                                      | 14                                        |
|                 |              | 4     | 300           | 99                | 64.8               | 57:43            | 31                                      | 13                                        |
|                 |              | 5     | 328           | 99                | 64.3               | 55:45            | 29                                      | 11                                        |
|                 |              | 6     | 354           | 99                | 65.0               | 56:44            | 26                                      | 12                                        |
|                 |              | 7     | 381           | 90,6              | 73.5               | 54:46            | 38                                      | 18                                        |

<sup>a</sup> Reactions were performed with EDA/ $\alpha$ -methylstyrene ratio = 1:5. [EDA] = 0.17 mol/L in DCE at room temperature. Flow 0.2 mL/min. <sup>b</sup> Determined by chiral HPLC equipped with DAICEL CHIRALPAK IB (*n*-hexane/*i*-PrOH = 99.25:0.75).

**Table S1b.** Cyclopropanation with  $\alpha$ -methylstyrene and EDA with **1/D**. (Data referred to Table 2, entry 3, run 2).<sup>a</sup>

| Catalyst<br>(g) | Cu<br>(mmol) | Entry | time<br>(min) | conversion<br>(%) | selectivity<br>(%) | <i>cis:trans</i> | <i>ee</i> (%) <sup>b</sup>              |                                           |
|-----------------|--------------|-------|---------------|-------------------|--------------------|------------------|-----------------------------------------|-------------------------------------------|
|                 |              |       |               |                   |                    |                  | <i>cis</i><br>(1 <i>R</i> ,2 <i>S</i> ) | <i>Trans</i><br>(1 <i>R</i> ,2 <i>R</i> ) |
| 0.4274          | 0.0565       | 1     | 226           | 39,2              | 61.2               | 49:51            | 29                                      | 15                                        |
|                 |              | 2     | 256           | 33,1              | 62.4               | 48:52            | 28                                      | 15                                        |
|                 |              | 3     | 287           | 24,9              | 63.7               | 46:54            | 26                                      | 14                                        |
|                 |              | 4     | 322           | 14,7              | 65.5               | 44:56            | 24                                      | 11                                        |
|                 |              | 5     | 352           | nd                | nd                 | nd               | 24                                      | 12                                        |
|                 |              | 6     | 378           | 4,2               | 67.3               | 45:55            | 20                                      | 16                                        |
|                 |              | 7     | 399           | 3,8               | 67.3               | nd               | 14                                      | 13                                        |

<sup>a</sup> Reactions were performed with EDA/ $\alpha$ -methylstyrene ratio = 1:5. [EDA] = 0.17 mol/L in DCE at room temperature. Flow 0.2 mL/min. <sup>b</sup> Determined by chiral HPLC equipped with DAICEL CHIRALPAK IB (*n*-hexane/*i*-PrOH = 99.25:0.75).

**Table S1c.** Cyclopropanation with  $\alpha$ -methylstyrene and EDA with **1/D**. (Data referred to Table 2, entry 4, run 1).<sup>a</sup>

| Catalyst<br>(g) | Cu<br>(mmol) | Entry | time<br>(min) | conversion<br>(%) | selectivity<br>(%) | <i>cis:trans</i> | <i>ee</i> (%) <sup>b</sup>              |                                           |
|-----------------|--------------|-------|---------------|-------------------|--------------------|------------------|-----------------------------------------|-------------------------------------------|
|                 |              |       |               |                   |                    |                  | <i>cis</i><br>(1 <i>R</i> ,2 <i>S</i> ) | <i>Trans</i><br>(1 <i>R</i> ,2 <i>R</i> ) |
| 0.4022          | 0.0532       | 1     | 180           | 99                | 54.9               | 70:30            | 54                                      | 24                                        |
|                 |              | 2     | 212           | 99                | 54.7               | 62:38            | 40                                      | 23                                        |
|                 |              | 3     | 243           | 99                | 54.4               | 61:39            | 36                                      | 21                                        |
|                 |              | 4     | 273           | 99                | 57.3               | 60:40            | 34                                      | 22                                        |
|                 |              | 5     | 303           | 99                | 56.5               | 58:42            | 30                                      | 21                                        |
|                 |              | 6     | 334           | 99                | 59.9               | 56:44            | 29                                      | 23                                        |
|                 |              | 7     | 364           | 99                | 59.6               | 55:45            | 32                                      | 29                                        |
|                 |              | 8     | 394           | 99                | 61.6               | 54:46            | 31                                      | 24                                        |

<sup>a</sup> Reactions were performed with EDA/ $\alpha$ -methylstyrene ratio = 1:5. [EDA] = 0.085 mol/L in DCE at room temperature. Flow 0.2 mL/min. <sup>b</sup> Determined by chiral HPLC equipped with DAICEL CHIRALPAK IB (*n*-hexane/*i*-PrOH = 99.25:0.75).

**Table S1d.** Cyclopropanation with  $\alpha$ -methylstyrene and EDA with **1/D**. (Data referred to Table 2, entry 5, run 1).<sup>a</sup>

| Cat.<br>(g) | Cu<br>(mmol) | Entry | time<br>(min) | conversion<br>(%) | selectivity<br>(%) | <i>cis:trans</i> | <i>ee</i> (%) <sup>b</sup>              |                                           | Cu leaching              |                   |
|-------------|--------------|-------|---------------|-------------------|--------------------|------------------|-----------------------------------------|-------------------------------------------|--------------------------|-------------------|
|             |              |       |               |                   |                    |                  | <i>cis</i><br>(1 <i>R</i> ,2 <i>S</i> ) | <i>trans</i><br>(1 <i>R</i> ,2 <i>R</i> ) | Cu <sup>c</sup><br>(ppb) | Cu<br>lost<br>(%) |
| 0.4068      | 0.0538       | 1     | 487           | 99                | 57.6               | 61:39            | 30                                      | 28                                        |                          |                   |
|             |              | 2     | 517           | 99                | 56.8               | 61:39            | 28                                      | 26                                        | 1143                     | 0.67              |
|             |              | 3     | 547           | 99                | 57.1               | 60:40            | 19                                      | 27                                        |                          |                   |
|             |              | 4     | 578           | 99                | 58.1               | 58:42            | 22                                      | 27                                        |                          |                   |
|             |              | 5     | 608           | 99                | 52.5               | 71:29            | 24                                      | 20                                        |                          |                   |
|             |              | 6     | 638           | 99                | 58.7               | 57:43            | 26                                      | 25                                        | 3788                     | 1.86              |
|             |              | 7     | 668           | 99                | 57.5               | 57:43            | n.d                                     | n.d                                       |                          |                   |

<sup>a</sup> Reactions were performed with EDA/ $\alpha$ -methylstyrene ratio = 1:5. [EDA] = 0.17 mol/L in DCE at room temperature. Flow 0.1 mL/min. <sup>b</sup> Determined by chiral HPLC equipped with DAICEL CHIRALPAK IB (*n*-hexane/*i*-PrOH = 99.25:0.75). <sup>c</sup> Although ultra-pure acids have been used for the mineralization process, ppb amounts of copper have also been found in blank test analyses.

**Table S1e.** Cyclopropanation with  $\alpha$ -methylstyrene and EDA with **1/D**. (Data referred to Table 2, entry 6, run 1).<sup>a</sup>

| Catalyst<br>(g) | Cu<br>(mmol) | Entry | time<br>(min) | conversion<br>(%) | selectivity<br>(%) | <i>cis:trans</i> | <i>ee</i> (%) <sup>b</sup>              |                                           |
|-----------------|--------------|-------|---------------|-------------------|--------------------|------------------|-----------------------------------------|-------------------------------------------|
|                 |              |       |               |                   |                    |                  | <i>cis</i><br>(1 <i>R</i> ,2 <i>S</i> ) | <i>Trans</i><br>(1 <i>R</i> ,2 <i>R</i> ) |
| 0.4081          | 0.0539       | 1     | 92            | 99                | 48.7               | 77:23            | 39                                      | 26                                        |
|                 |              | 2     | 122           | 99                | 53.4               | 67:33            | 36                                      | 24                                        |
|                 |              | 3     | 153           | 99                | 59.2               | 64:38            | 46                                      | 26                                        |
|                 |              | 4     | 183           | 99                | 65.8               | 57:43            | 55                                      | 32                                        |
|                 |              | 5     | 213           | 99                | 70.6               | 57:43            | 68                                      | 32                                        |
|                 |              | 6     | 244           | nd                | nd                 | nd               | 67                                      | 33                                        |
|                 |              | 7     | 274           | 99                | 71.2               | 58:42            | 68                                      | 33                                        |
|                 |              | 8     | 304           | 99                | 65.4               | 59:41            | 68                                      | 30                                        |
|                 |              | 9     | 335           | 99                | 57.9               | 62:38            | 63                                      | 29                                        |
|                 |              | 10    | 346           | 99                | 52.3               | 65:35            | 67                                      | 28                                        |

<sup>a</sup> Reactions were performed with EDA/ $\alpha$ -methylstyrene ratio = 1:5. [EDA] = 0.17 mol/L in DCE at room temperature. Flow 0.5 mL/min. <sup>b</sup> Determined by chiral HPLC equipped with DAICEL CHIRALPAK IB (*n*-hexane/*i*-PrOH = 99.25:0.75).

**Table S1f.** Cyclopropanation with  $\alpha$ -methylstyrene and EDA with **1/D**. (Data referred to Table 2, entry 6, run 2).<sup>a</sup>

| Catalyst<br>(g) | Cu<br>(mmol) | Entry | time<br>(min) | conversion<br>(%) | selectivity<br>(%) | <i>cis:trans</i> | <i>ee</i> (%) <sup>b</sup>              |                                           |
|-----------------|--------------|-------|---------------|-------------------|--------------------|------------------|-----------------------------------------|-------------------------------------------|
|                 |              |       |               |                   |                    |                  | <i>cis</i><br>(1 <i>R</i> ,2 <i>S</i> ) | <i>Trans</i><br>(1 <i>R</i> ,2 <i>R</i> ) |
| 0.4081          | 0.0539       | 1     | 30            | 99                | 58.6               | 54:46            | 55                                      | 30                                        |
|                 |              | 2     | 60            | 78                | 55.6               | 54:46            | 46                                      | 30                                        |
|                 |              | 3     | 91            | 59                | 52.6               | 56:44            | 12                                      | nd                                        |
|                 |              | 4     | 121           | 11                | nd                 | nd               | nd                                      | nd                                        |

<sup>a</sup> Reactions were performed with EDA/ $\alpha$ -methylstyrene ratio = 1:5. [EDA] = 0.17 mol/L in DCE at room temperature. Flow 0.5 mL/min. <sup>b</sup> Determined by chiral HPLC equipped with DAICEL CHIRALPAK IB (*n*-hexane/*i*-PrOH = 99.25:0.75).

**Table S2a.** Cyclopropanation with  $\alpha$ -methylstyrene and EDA with **1/D** under CO<sub>2</sub>. (Data referred to Table 3, entry 1, run 1).<sup>a</sup>

| Cat.<br>(g) | Cu<br>(mmol) | Entry | time<br>(min) | conversion<br>(%) | selectivity<br>(%) | <i>cis:trans</i> | <i>ee</i> (%) <sup>b</sup>              |                                           | Cu leaching              |                |
|-------------|--------------|-------|---------------|-------------------|--------------------|------------------|-----------------------------------------|-------------------------------------------|--------------------------|----------------|
|             |              |       |               |                   |                    |                  | <i>cis</i><br>(1 <i>R</i> ,2 <i>S</i> ) | <i>trans</i><br>(1 <i>R</i> ,2 <i>R</i> ) | Cu <sup>c</sup><br>(ppb) | Cu lost<br>(%) |
| 0.4003      | 0.0529       | 1     | 191           | 99                | 61.2               | 63:37            | 39                                      | 33                                        | 4.3                      | 0.0016         |
|             |              | 2     | 222           | 99                | 64.6               | 60:40            | 37                                      | 32                                        |                          |                |
|             |              | 3     | 254           | 99                | 65.7               | 66:34            | 37                                      | 32                                        |                          |                |
|             |              | 4     | 285           | 99                | 66.7               | 68:32            | 37                                      | 33                                        |                          |                |
|             |              | 5     | 317           | 99                | 67.1               | 66:34            | 36                                      | 34                                        |                          |                |
|             |              | 6     | 347           | 99                | 67.5               | 69:31            | 33                                      | 41                                        |                          |                |
|             |              | 7     | 377           | 99                | 67.8               | 71:29            | 32                                      | 42                                        |                          |                |
|             |              | 8     | 407           | 99                | 66.7               | 67:33            | 38                                      | 29                                        |                          |                |
|             |              | 9     | 438           | 99                | 66.1               | 70:30            | 36                                      | 33                                        |                          |                |
|             |              | 10    | 468           | 99                | 64.4               | 66:34            | 38                                      | 31                                        |                          |                |

<sup>a</sup> Reactions were performed with EDA/ $\alpha$ -methylstyrene ratio = 1:5; T = 40°C,  $P_{\text{CO}_2}$  = 130 bar, flow CO<sub>2</sub> = 0.5 mL/min, flow HPLC = 0.02 mL/min. <sup>b</sup> Determined by chiral HPLC equipped with DAICEL CHIRALPAK IB (*n*-hexane/*i*-PrOH = 99.25:0.75). <sup>c</sup> Although ultra-pure acids have been used for the mineralization process, ppb amounts of copper have also been found in blank test analyses.

**Table S2b.** Cyclopropanation with  $\alpha$ -methylstyrene and EDA with **1/D** under CO<sub>2</sub>. (Data referred to Table 3, entry 1, run 2).<sup>a</sup>

| Catalyst<br>(g) | Cu<br>(mmol) | Entry | time<br>(min) | conversion<br>(%) | selectivity<br>(%) | <i>cis:trans</i> | <i>ee</i> (%) <sup>b</sup>              |                                           |
|-----------------|--------------|-------|---------------|-------------------|--------------------|------------------|-----------------------------------------|-------------------------------------------|
|                 |              |       |               |                   |                    |                  | <i>cis</i><br>(1 <i>R</i> ,2 <i>S</i> ) | <i>Trans</i><br>(1 <i>R</i> ,2 <i>R</i> ) |
| 0.4003          | 0.0529       | 1     | 30            | 99                | 64.7               | 68:32            | 44                                      | 25                                        |
|                 |              | 2     | 91            | 99                | 66.0               | 70:30            | 43                                      | 27                                        |
|                 |              | 3     | 129           | 99                | 66.3               | 66:34            | 45                                      | 23                                        |
|                 |              | 4     | 159           | 99                | 65.1               | 69:31            | 42                                      | 28                                        |

<sup>a</sup> Reactions were performed with EDA/ $\alpha$ -methylstyrene ratio = 1:5; T = 40°C,  $P_{\text{CO}_2}$  = 130 bar, flow CO<sub>2</sub> = 0.5 mL/min, flow HPLC = 0.02 mL/min. <sup>b</sup> Determined by chiral HPLC equipped with DAICEL CHIRALPAK IB (*n*-hexane/*i*-PrOH = 99.25:0.75).

**Table S2c.** Cyclopropanation with  $\alpha$ -methylstyrene and EDA with **1/D** under CO<sub>2</sub>. (Data referred to Table 3, entry 2, run 1).<sup>a</sup>

| Catalyst<br>(g) | Cu<br>(mmol) | Entry | time<br>(min) | conversion<br>(%) | selectivity<br>(%) | <i>cis:trans</i> | <i>ee</i> (%) <sup>b</sup>              |                                           |
|-----------------|--------------|-------|---------------|-------------------|--------------------|------------------|-----------------------------------------|-------------------------------------------|
|                 |              |       |               |                   |                    |                  | <i>cis</i><br>(1 <i>R</i> ,2 <i>S</i> ) | <i>Trans</i><br>(1 <i>R</i> ,2 <i>R</i> ) |
| 0.3943          | 0.0521       | 1     | 147           | 99                | 48.9               | 64:36            | 36                                      | 20                                        |
|                 |              | 2     | 178           | 99                | 45.3               | 64:36            | 42                                      | 22                                        |
|                 |              | 3     | 208           | 99                | 45.4               | 65:35            | 40                                      | 26                                        |
|                 |              | 4     | 239           | 99                | 44.6               | 64:36            | 43                                      | 28                                        |
|                 |              | 5     | 270           | 99                | 44.4               | 62:38            | 41                                      | 25                                        |
|                 |              | 6     | 300           | 99                | 44.9               | 63:37            | 39                                      | 25                                        |
|                 |              | 7     | 330           | 99                | 45.2               | 62:38            | 31                                      | 26                                        |
|                 |              | 8     | 361           | 99                | 46.1               | 61:39            | 39                                      | 27                                        |
|                 |              | 9     | 391           | 99                | 45.8               | 60:40            | 37                                      | 26                                        |
|                 |              | 10    | 422           | 99                | 46.8               | 60:40            | 36                                      | 26                                        |
|                 |              | 11    | 452           | 99                | 46.6               | 61:39            | 38                                      | 25                                        |
|                 |              | 12    | 483           | 99                | 47.3               | 60:40            | 38                                      | 25                                        |
|                 |              | 13    | 513           | 99                | 48.1               | 59:39            | 35                                      | 25                                        |
|                 |              | 14    | 543           | 99                | 49.0               | 60:40            | 38                                      | 25                                        |

<sup>a</sup> Reactions were performed with EDA/ $\alpha$ -methylstyrene ratio = 1:2; T = 40°C,  $P_{\text{CO}_2}$  = 130 bar, flow CO<sub>2</sub> = 0.5 mL/min, flow HPLC = 0.02 mL/min. <sup>b</sup> Determined by chiral HPLC equipped with DAICEL CHIRALPAK IB (*n*-hexane/*i*-PrOH = 99.25:0.75).



**Table S2d.** Cyclopropanation with  $\alpha$ -methylstyrene and EDA with **1/D** under CO<sub>2</sub>. (Data referred to Table 3, entry 3, run 1).<sup>a</sup>

| Catalyst<br>(g) | Cu<br>(mmol) | Entry | time<br>(min) | conversion<br>(%) | selectivity<br>(%) | <i>cis:trans</i> | <i>ee</i> (%) <sup>b</sup>              |                                           |
|-----------------|--------------|-------|---------------|-------------------|--------------------|------------------|-----------------------------------------|-------------------------------------------|
|                 |              |       |               |                   |                    |                  | <i>cis</i><br>(1 <i>R</i> ,2 <i>S</i> ) | <i>Trans</i><br>(1 <i>R</i> ,2 <i>R</i> ) |
| 0.3393          | 0.0448       | 1     | 148           | 99                | 67.2               | 63:37            | 36                                      | 26                                        |
|                 |              | 2     | 179           | 99                | 74.5               | 70:30            | 37                                      | 27                                        |
|                 |              | 3     | 210           | 99                | 75.3               | 69:31            | 37                                      | 27                                        |
|                 |              | 4     | 240           | 99                | 77.1               | 69:31            | 32                                      | 31                                        |
|                 |              | 5     | 270           | 99                | 77.6               | 70:30            | 36                                      | 30                                        |
|                 |              | 6     | 301           | 99                | 73.8               | 79:21            | 36                                      | 28                                        |
|                 |              | 7     | 331           | 99                | 73.1               | 83:17            | 29                                      | 29                                        |
|                 |              | 8     | 362           | 99                | 73.2               | 79:21            | 45                                      | 25                                        |
|                 |              | 9     | 393           | 99                | 64.4               | 90:10            | 41                                      | 23                                        |
|                 |              | 10    | 512           | 99                | 75.8               | 70:30            | 38                                      | 26                                        |
|                 |              | 11    | 543           | nd                | nd                 | nd               | nd                                      | nd                                        |
|                 |              | 12    | 573           | 99                | 70.9               | 69:31            | 38                                      | 27                                        |
|                 |              | 13    | 603           | 99                | 69.2               | 72:28            | 32                                      | 28                                        |

<sup>a</sup> Reactions were performed with EDA/ $\alpha$ -methylstyrene ratio = 1:10; T = 40°C,  $P_{\text{CO}_2}$  = 130 bar, flow CO<sub>2</sub> = 0.5 mL/min, flow HPLC = 0.02 mL/min. <sup>b</sup> Determined by chiral HPLC equipped with DAICEL CHIRALPAK IB (*n*-hexane/*i*-PrOH = 99.25:0.75).

**Table S2e.** Cyclopropanation with  $\alpha$ -methylstyrene and EDA with **1/M** under CO<sub>2</sub>. (Data referred to Table 3, entry 4, run 1).<sup>a</sup>

| Cat.<br>(g) | Cu<br>(mmol) | Entry | time<br>(min) | conversion<br>(%) | selectivity<br>(%) | <i>cis:trans</i> | <i>ee</i> (%) <sup>b</sup>              |                                           | Cu leaching              |                |
|-------------|--------------|-------|---------------|-------------------|--------------------|------------------|-----------------------------------------|-------------------------------------------|--------------------------|----------------|
|             |              |       |               |                   |                    |                  | <i>cis</i><br>(1 <i>R</i> ,2 <i>S</i> ) | <i>trans</i><br>(1 <i>R</i> ,2 <i>R</i> ) | Cu <sup>c</sup><br>(ppb) | Cu lost<br>(%) |
| 0.4044      | 0.0541       | 1     | 131           | 99                | 87.6               | 58:42            | 29                                      | 32                                        |                          |                |
|             |              | 2     | 162           | 99                | 87.4               | 58:42            | 41                                      | 35                                        |                          |                |
|             |              | 3     | 192           | 99                | 87.5               | 59:41            | 41                                      | 32                                        | 10.8                     | 0.0074         |
|             |              | 4     | 223           | 99                | 87.3               | 60:40            | 42                                      | 26                                        |                          |                |
|             |              | 5     | 255           | 99                | 87.6               | 60:40            | 42                                      | 28                                        |                          |                |
|             |              | 6     | 285           | 99                | 87.5               | 59:41            | 41                                      | 29                                        |                          |                |
|             |              | 7     | 316           | 99                | 87.5               | 59:41            | 40                                      | 28                                        | 7.18                     | 0.0041         |
|             |              | 8     | 346           | 99                | 87.9               | 58:42            | 42                                      | 25                                        |                          |                |
|             |              | 9     | 378           | 99                | 88.5               | 58:42            | 42                                      | 29                                        |                          |                |
|             |              | 10    | 408           | 99                | 88.5               | 58:42            | 42                                      | 29                                        |                          |                |
|             |              | 11    | 439           | 99                | 88.5               | 57:43            | 42                                      | 29                                        |                          |                |
|             |              | 12    | 470           | 99                | 88.5               | 59:41            | 34                                      | 30                                        |                          |                |

<sup>a</sup> Reactions were performed with EDA/ $\alpha$ -methylstyrene ratio = 1:5; T = 40°C,  $P_{\text{CO}_2}$  = 130 bar, flow CO<sub>2</sub> = 0.5 mL/min, flow HPLC = 0.02 mL/min. <sup>b</sup> Determined by chiral HPLC equipped with DAICEL CHIRALPAK IB (*n*-hexane/*i*-PrOH = 99.25:0.75). <sup>c</sup> Although ultra-pure acids have been used for the mineralization process, ppb amounts of copper have also been found in blank test analyses.

**Table S2f.** Cyclopropanation with  $\alpha$ -methylstyrene and EDA with **1/A** under CO<sub>2</sub>. (Data referred to Table 3, entry 4, run 1).<sup>a</sup>

| Catalyst<br>(g) | Cu<br>(mmol) | Entry | time<br>(min) | conversion<br>(%) | selectivity<br>(%) | <i>cis:trans</i> | <i>ee</i> (%) <sup>b</sup>              |                                           |
|-----------------|--------------|-------|---------------|-------------------|--------------------|------------------|-----------------------------------------|-------------------------------------------|
|                 |              |       |               |                   |                    |                  | <i>cis</i><br>(1 <i>R</i> ,2 <i>S</i> ) | <i>Trans</i><br>(1 <i>R</i> ,2 <i>R</i> ) |
| 0.4229          | 0.0540       | 1     | 137           | 99                | 66.3               | 58:42            | 34                                      | 26                                        |
|                 |              | 2     | 228           | 99                | 71.7               | 58:42            | 24                                      | 28                                        |
|                 |              | 3     | 290           | 99                | 69.1               | 58:42            | 34                                      | 18                                        |
|                 |              | 4     | 351           | 99                | 72.6               | 59:41            | 33                                      | 23                                        |
|                 |              | 5     | 412           | 99                | 73.1               | 53:47            | 40                                      | 17                                        |
|                 |              | 6     | 472           | 99                | 80.7               | 54:46            | 38                                      | 15                                        |

<sup>a</sup> Reactions were performed with EDA/ $\alpha$ -methylstyrene ratio = 1:5; T = 40°C,  $P_{\text{CO}_2}$  = 130 bar, flow CO<sub>2</sub> = 0.5 mL/min, flow HPLC = 0.02 mL/min. <sup>b</sup> Determined by chiral HPLC equipped with DAICEL CHIRALPAK IB (*n*-hexane/*i*-PrOH = 99.25:0.75).

**Table S3a.** Cyclopropanation with  $\alpha$ -methylstyrene and EDA with **2/D** under CO<sub>2</sub>. (Data referred to Table 4, entry 1, run 1).<sup>a</sup>

| Cat.<br>(g) | Cu<br>(mmol) | Entry | time<br>(min) | conversion<br>(%) | selectivity<br>(%) | <i>cis:trans</i> | <i>ee</i> (%) <sup>b</sup>              |                                           | Cu leaching              |                |
|-------------|--------------|-------|---------------|-------------------|--------------------|------------------|-----------------------------------------|-------------------------------------------|--------------------------|----------------|
|             |              |       |               |                   |                    |                  | <i>cis</i><br>(1 <i>S</i> ,2 <i>R</i> ) | <i>trans</i><br>(1 <i>S</i> ,2 <i>S</i> ) | Cu <sup>c</sup><br>(ppb) | Cu lost<br>(%) |
| 0.4157      | 0.0430       | 1     | 92            | 99                | 67.3               | 59:41            | 57                                      | 67                                        |                          |                |
|             |              | 2     | 122           | 99                | 65.1               | 57:43            | 60                                      | 70                                        |                          |                |
|             |              | 3     | 153           | 99                | 66.0               | 58:42            | 59                                      | 70                                        |                          |                |
|             |              | 4     | 183           | 99                | 66.1               | 59:41            | 60                                      | 67                                        |                          |                |
|             |              | 5     | 273           | 99                | 66.1               | 57:43            | 63                                      | 70                                        |                          |                |
|             |              | 6     | 336           | 99                | 69.6               | 57:43            | 59                                      | 68                                        |                          |                |
|             |              | 7     | 366           | 99                | 67.8               | 57:43            | 56                                      | 67                                        | 3.2                      | 0.0022         |
|             |              | 8     | 397           | 99                | 69.2               | 57:43            | 58                                      | 68                                        |                          |                |
|             |              | 9     | 427           | 99                | 69.7               | 55:45            | 58                                      | 69                                        |                          |                |
|             |              | 10    | 457           | 99                | 71.0               | 56:44            | 57                                      | 69                                        |                          |                |
|             |              | 11    | 488           | 99                | 72.4               | 55:45            | 56                                      | 66                                        |                          |                |
|             |              | 12    | 518           | 99                | 72.3               | 58:42            | 57                                      | 66                                        |                          |                |

<sup>a</sup> Reactions were performed with EDA/ $\alpha$ -methylstyrene ratio = 1:5; T = 40°C,  $P_{\text{CO}_2}$  = 130 bar, flow CO<sub>2</sub> = 0.5 mL/min, flow HPLC = 0.02 mL/min. <sup>b</sup> Determined by chiral HPLC equipped with DAICEL CHIRALPAK IB (*n*-hexane/*i*-PrOH = 99.25:0.75). <sup>c</sup> Although ultra-pure acids have been used for the mineralization process, ppb amounts of copper have also been found in blank test analyses.

**Table S4a.** Cyclopropanation with styrene and EDA by **2/D** under CO<sub>2</sub>. (Data referred to Table 5, entry 1, run 1).<sup>a</sup>

| Cat.<br>(g) | Cu<br>(mmol) | Entry | time<br>(min) | conversion<br>(%) | selectivity<br>(%) | <i>cis:trans</i> | <i>ee</i> (%) <sup>b</sup>              |                                           | Cu <sup>c</sup><br>(ppb) |
|-------------|--------------|-------|---------------|-------------------|--------------------|------------------|-----------------------------------------|-------------------------------------------|--------------------------|
|             |              |       |               |                   |                    |                  | <i>cis</i><br>(1 <i>S</i> ,2 <i>R</i> ) | <i>trans</i><br>(1 <i>S</i> ,2 <i>S</i> ) |                          |
| 0.4022      | 0.0416       | 1     | 185           | 99                | 61.1               | 33:67            | 58                                      | 55                                        |                          |
|             |              | 2     | 245           | 99                | 63.5               | 33:67            | 63                                      | 57                                        | 10.2                     |
|             |              | 3     | 306           | 99                | 65.2               | 32:68            | 60                                      | 56                                        |                          |
|             |              | 4     | 360           | 99                | 65.8               | 31:69            | 59                                      | 56                                        |                          |
|             |              | 5     | 427           | 99                | 66.6               | 31:69            | 63                                      | 55                                        |                          |
|             |              | 6     | 487           | 99                | 66.9               | 36:64            | 65                                      | 53                                        |                          |
|             |              | 7     | 547           | 99                | 69.1               | 30:70            | 65                                      | 54                                        |                          |

<sup>a</sup> Reactions were performed with EDA/styrene ratio = 1:5; T = 40°C,  $P_{\text{CO}_2}$  = 130 bar, flow CO<sub>2</sub> = 0.5 mL/min, flow HPLC = 0.02 mL/min. <sup>b</sup> Determined by chiral HPLC equipped with DAICEL CHIRALPAK OJ (*n*-hexane/*i*-PrOH = 98:2). <sup>c</sup> Although ultra-pure acids have been used for the mineralization process, ppb amounts of copper have also been found in blank test analyses.

**Table S4b.** Cyclopropanation with 4-chlorostyrene and EDA by **2/D** under CO<sub>2</sub>. (Data referred to Table 5, entry 2, run 1).<sup>a</sup>

| Cat.<br>(g) | Cu<br>(mmol) | Entry | time<br>(min) | conversion<br>(%) | selectivity<br>(%) | <i>cis:trans</i> | <i>ee</i> (%) <sup>b</sup>              |                                           | $\overline{\text{Cu}}^c$<br>(ppb) |
|-------------|--------------|-------|---------------|-------------------|--------------------|------------------|-----------------------------------------|-------------------------------------------|-----------------------------------|
|             |              |       |               |                   |                    |                  | <i>cis</i><br>(1 <i>S</i> ,2 <i>R</i> ) | <i>trans</i><br>(1 <i>S</i> ,2 <i>S</i> ) |                                   |
| 0.4020      | 0.0416       | 1     | 121           | 99                | 54.6               | 56:44            | 44                                      | 69                                        |                                   |
|             |              | 2     | 182           | 99                | 77.5               | 48:52            | 41                                      | 71                                        |                                   |
|             |              | 3     | 242           | 99                | 81.9               | 47:53            | 44                                      | 69                                        | 24.9                              |
|             |              | 4     | 302           | 99                | 84.2               | 46:54            | 42                                      | 72                                        |                                   |
|             |              | 5     | 518           | 99                | 85.1               | 46:54            | 44                                      | 75                                        |                                   |
|             |              | 6     | 582           | 99                | 83.2               | 46:54            | 44                                      | 73                                        |                                   |

<sup>a</sup> Reactions were performed with EDA/4-chlorostyrene ratio = 1:5; T = 40°C,  $P_{\text{CO}_2}$  = 130 bar, flow CO<sub>2</sub> = 0.5 mL/min, flow HPLC = 0.02 mL/min. <sup>b</sup> Determined by chiral HPLC equipped with DAICEL CHIRALPAK OJ (*n*-hexane/*i*-PrOH = 99:1). <sup>c</sup> Although ultra-pure acids have been used for the mineralization process, ppb amounts of copper have also been found in blank test analyses.

**Table S4c.** Cyclopropanation with 1,1-diphenylethylene and EDA by **2/D** under CO<sub>2</sub>. (Data referred to Table 5, entry 3, run 1).<sup>a</sup>

| Cat.<br>(g) | Cu<br>(mmol) | Entry | time<br>(min) | conversion<br>(%) | selectivity<br>(%) | <i>cis:trans</i> | <i>ee</i> (%) <sup>b</sup> | $\overline{\text{Cu}}^c$<br>(ppb) |
|-------------|--------------|-------|---------------|-------------------|--------------------|------------------|----------------------------|-----------------------------------|
|             |              |       |               |                   |                    |                  | (1 <i>S</i> )              |                                   |
| 0.3969      | 0.0410       | 1     | 143           | n.d.              | n.d.               | -                | n.d.                       |                                   |
|             |              | 2     | 203           | 99                | 45.5               | -                | 62                         |                                   |
|             |              | 3     | 264           | 99                | 51.0               | -                | 62                         |                                   |
|             |              | 4     | 324           | 99                | 49.1               | -                | 72                         |                                   |
|             |              | 5     | 384           | 99                | 48.0               | -                | 64                         |                                   |
|             |              | 6     | 445           | 99                | 53.1               | -                | 66                         | 17.3                              |
|             |              | 7     | 505           | 99                | 57.5               | -                | 67                         |                                   |
|             |              | 8     | 565           | 99                | 57.9               | -                | 64                         |                                   |

<sup>a</sup> Reactions were performed with EDA/1,1-diphenylethylene ratio = 1:5; T = 40°C,  $P_{\text{CO}_2}$  = 130 bar, flow CO<sub>2</sub> = 0.5 mL/min, flow HPLC = 0.02 mL/min. <sup>b</sup> Determined by chiral HPLC equipped with DAICEL CHIRALPAK AD (*n*-hexane/*i*-PrOH = 99.66:0.33). <sup>c</sup> Although ultra-pure acids have been used for the mineralization process, ppb amounts of copper have also been found in blank test analyses.

**Table S4d.** Cyclopropanation with methyl-2-furoate and EDA by **2/D** under CO<sub>2</sub>. (Data referred to Table 5, entry 4, run 1).<sup>a</sup>

| Cat.<br>(g) | Cu<br>(mmol) | Entry | time<br>(min) | conversion<br>(%) | selectivity<br>(%) | <i>cis:trans</i> | <i>ee</i> (%) <sup>b</sup> |                                                       | Cu leaching              |                |
|-------------|--------------|-------|---------------|-------------------|--------------------|------------------|----------------------------|-------------------------------------------------------|--------------------------|----------------|
|             |              |       |               |                   |                    |                  | <i>cis</i>                 | <i>trans</i><br>(1 <i>R</i> ,5 <i>R</i> ,6 <i>R</i> ) | Cu <sup>c</sup><br>(ppb) | Cu lost<br>(%) |
| 0.4064      | 0.0420       | 1     | 178           | 99                | 30.1               | <1:>99           | -                          | 68                                                    |                          |                |
|             |              | 2     | 239           | 99                | 35.1               | <1:>99           | -                          | 67                                                    |                          |                |
|             |              | 3     | 300           | 99                | 34.3               | <1:>99           | -                          | 68                                                    |                          |                |
|             |              | 4     | 362           | 99                | 34.7               | <1:>99           | -                          | 66                                                    |                          |                |
|             |              | 5     | 422           | 99                | 34.5               | <1:>99           | -                          | 66                                                    | 122.5                    | 0.0905         |
|             |              | 6     | 482           | 99                | 32.5               | <1:>99           | -                          | 66                                                    |                          |                |
|             |              | 7     | 542           | 99                | 30.3               | <1:>99           | -                          | 65                                                    | 39.8                     |                |

<sup>a</sup> Reactions were performed with EDA/methyl-2-furoate ratio = 1:5; T = 40°C,  $P_{\text{CO}_2}$  = 130 bar, flow CO<sub>2</sub> = 0.5 mL/min, flow HPLC = 0.02 mL/min. <sup>b</sup> Determined by chiral HPLC equipped with DAICEL CHIRALPAK OJ (*n*-hexane/*i*-PrOH = 90:10). <sup>c</sup> Although ultra-pure acids have been used for the mineralization process, ppb amounts of copper have also been found in blank test analyses.

**Table S4e.** Cyclopropanation with 1-octene and EDA by **2/D** under CO<sub>2</sub>. (Data referred to Table 5, entry 5, run 1).<sup>a</sup>

| Cat.<br>(g) | Cu<br>(mmol) | Entry | time<br>(min) | conversion<br>(%) | selectivity<br>(%) | <i>cis:trans</i> | <i>ee</i> (%) <sup>b</sup> |                        | Cu <sup>c</sup><br>(ppb) |
|-------------|--------------|-------|---------------|-------------------|--------------------|------------------|----------------------------|------------------------|--------------------------|
|             |              |       |               |                   |                    |                  | <i>cis</i><br>(n.d.)       | <i>trans</i><br>(n.d.) |                          |
| 0.4097      | 0.0424       | 1     | 154           | 99                | 68.0               | 48:52            | 72                         | 39                     |                          |
|             |              | 2     | 237           | 99                | 70.6               | 47:53            | 72                         | 42                     | 8.1                      |
|             |              | 3     | 298           | 99                | 70.4               | 47:53            | 71                         | 41                     |                          |
|             |              | 4     | 357           | 99                | 71.0               | 48:52            | 63                         | 39                     |                          |
|             |              | 5     | 417           | 99                | 72.6               | 49:51            | 64                         | 41                     |                          |
|             |              | 6     | 477           | 99                | 74.8               | 49:51            | 63                         | 39                     |                          |

<sup>a</sup> Reactions were performed with EDA/1-octene ratio = 1:10; T = 40°C,  $P_{\text{CO}_2}$  = 130 bar, flow CO<sub>2</sub> = 0.5 mL/min, flow HPLC = 0.02 mL/min. <sup>b</sup> Determined by chiral HPLC equipped with DAICEL CHIRALPAK OJ (*n*-hexane/*i*-PrOH = 99.9:0.1).

**Table S5.** Reaction between with  $\alpha$ -methylstyrene and EDA in the presence of bare Davisil under  $\text{CO}_2$ .<sup>a</sup>

| Silica (g) | Entry | time (min) | conversion (%) | selectivity in fum + mal(%) <sup>b</sup> | mal:fum |
|------------|-------|------------|----------------|------------------------------------------|---------|
| 0.4112     | 1     | 245        | 49             | 68.1                                     | 2:1     |
|            | 2     | 305        | 51             | 65.7                                     | 2:1     |
|            | 3     | 366        | 50             | 63.1                                     | 2:1     |
|            | 4     | 427        | 49             | 64.6                                     | 2: 1    |
|            | 5     | 486        | 42             | 72.1                                     | 2:1     |

<sup>a</sup> Reactions were performed with EDA/ $\alpha$ -methylstyrene ratio = 1:5; T = 40°C,  $P_{\text{CO}_2}$  = 130 bar, flow  $\text{CO}_2$  = 0.5 mL/min, flow HPLC = 0.02 mL/min. <sup>b</sup> The selectivity in this case is reported as the sum of maleate and fumarate, which are the major reaction products. Traces of cyclopropane products (*cis/trans* ratio ca. 3:2) were also detected in the reaction mixture.

**Figure S1.** Chemoselectivity (%) vs time of stream (minutes) of the cyclopropanation reaction of different alkenes catalysed by **2/D**.

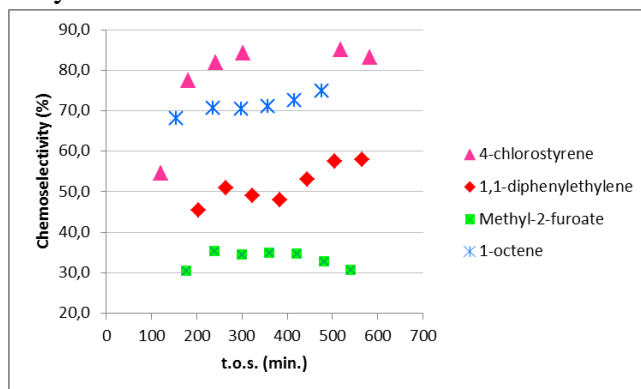

**Figure S2.** DRIFT spectra showing the comparison of supported catalyst **2/D** and free complex **2** in KBr.

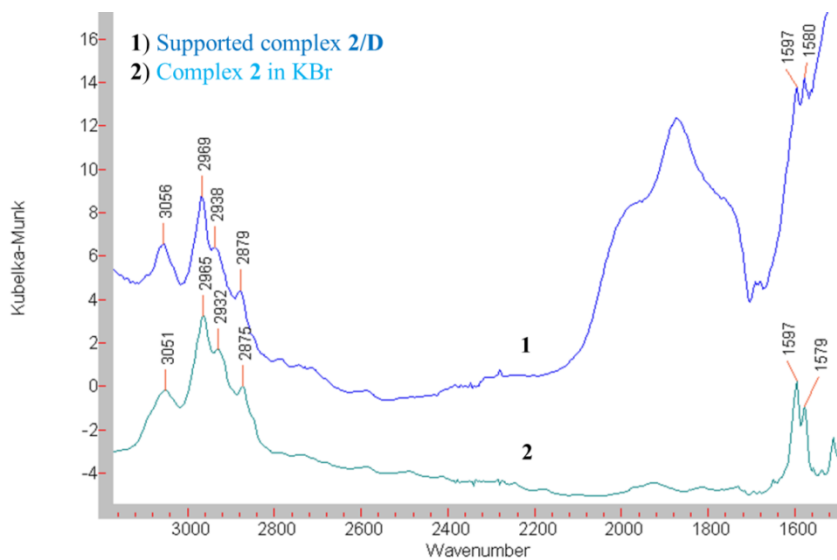

**Figure S3.** CO-DRIFT spectra showing the comparison of catalyst **2/D** pre- and post-catalysis with 4-chlorostyrene and  $\alpha$ -methylstyrene and EDA after treatment under CO atmosphere. While the copper catalyst adsorb CO, the material after catalysis does not.

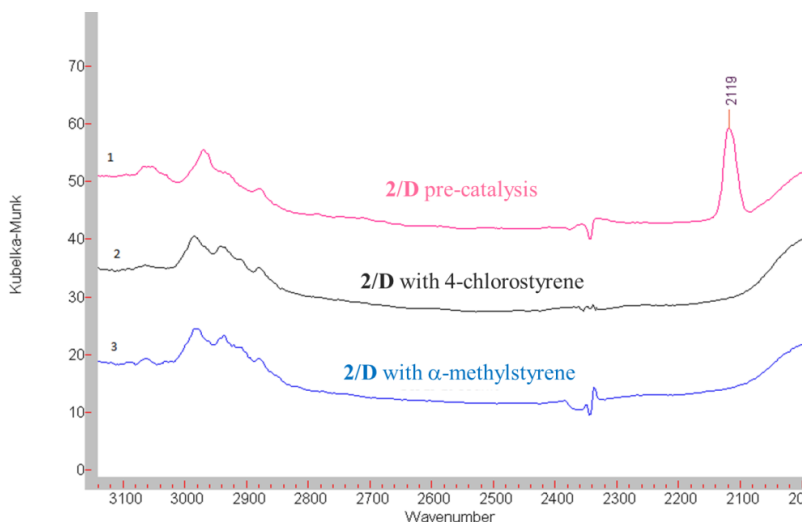

**Figure S4.** DRIFT spectra showing the comparison of catalyst **2/D** pre- and post-catalysis with different alkenes and EDA.

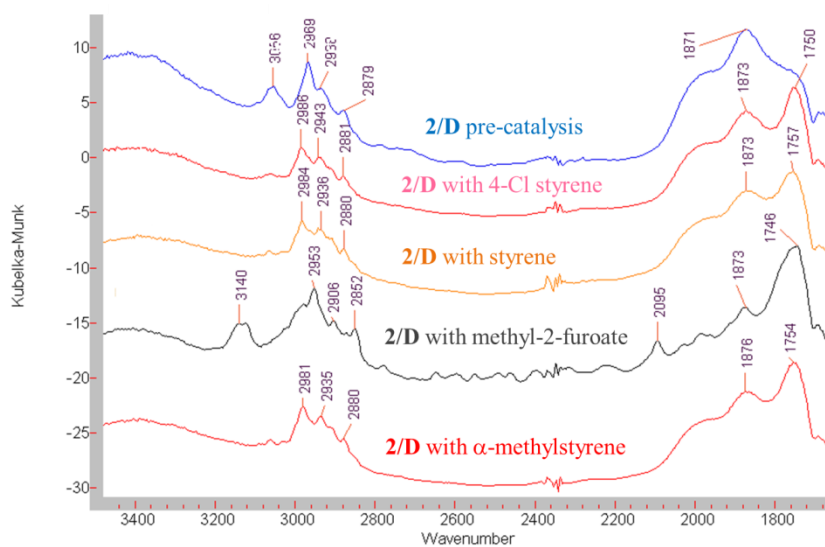

**Figure S5.** Spectra in 1,2-DCE of catalyst **2** with ethyl-fumarate, showing the interaction of this molecule with the catalyst.

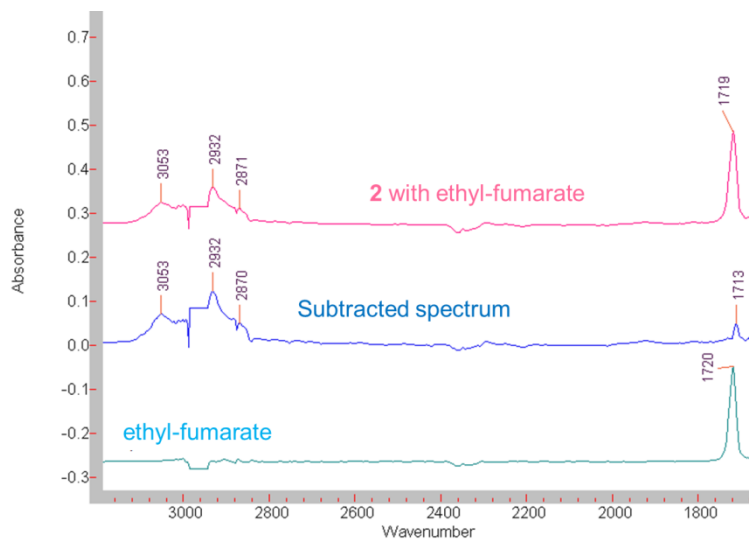

**Figure S6.** Spectra in 1,2-DCE of catalyst **2** with ethyl-maleate, showing the interaction of this molecule with the catalyst.

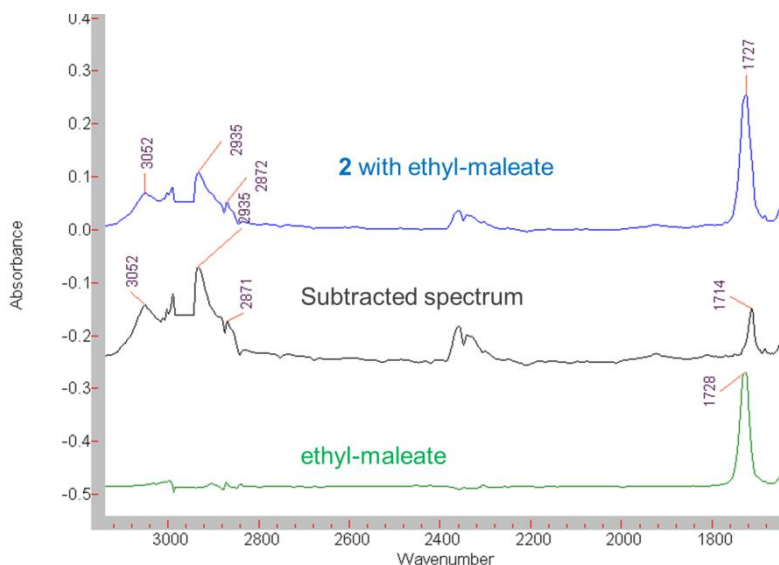



# <sup>1</sup>H NMR and HPLC analysis of selected samples.

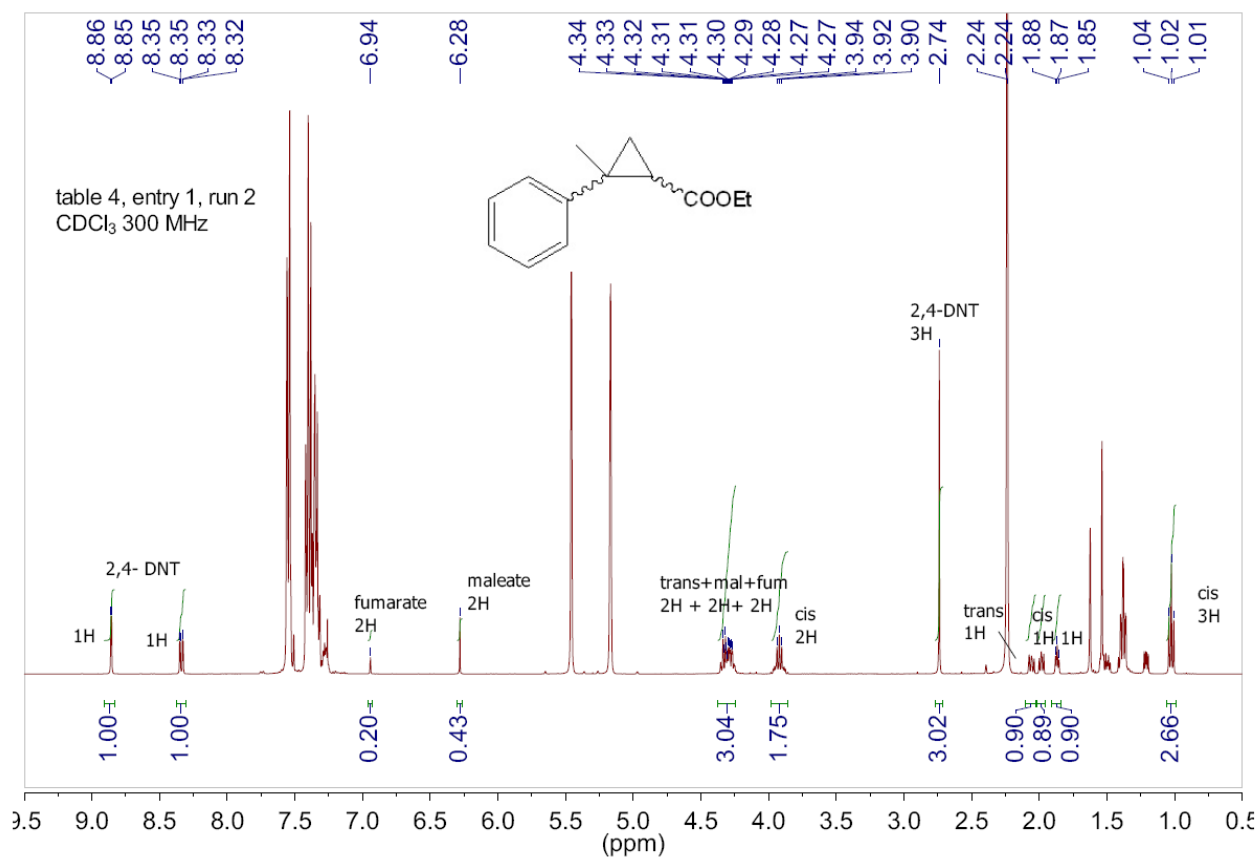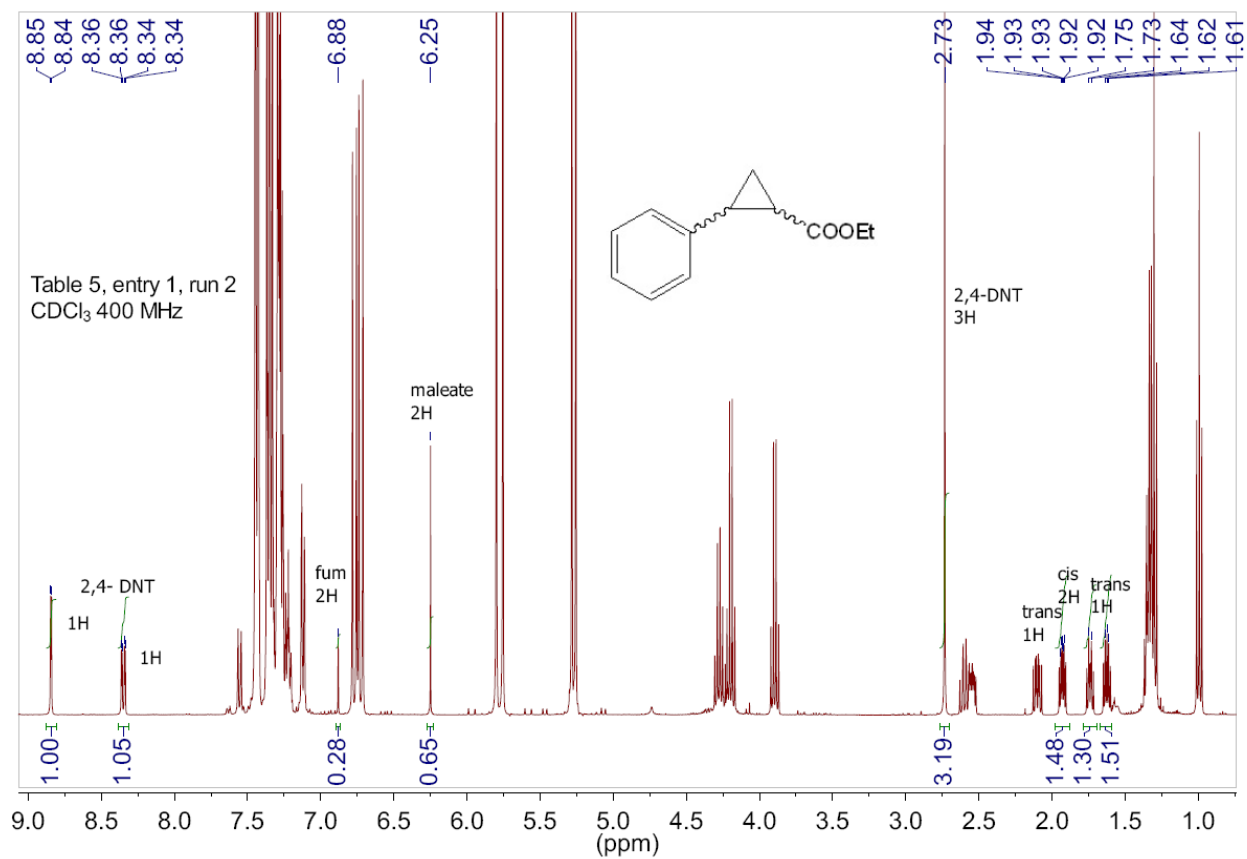

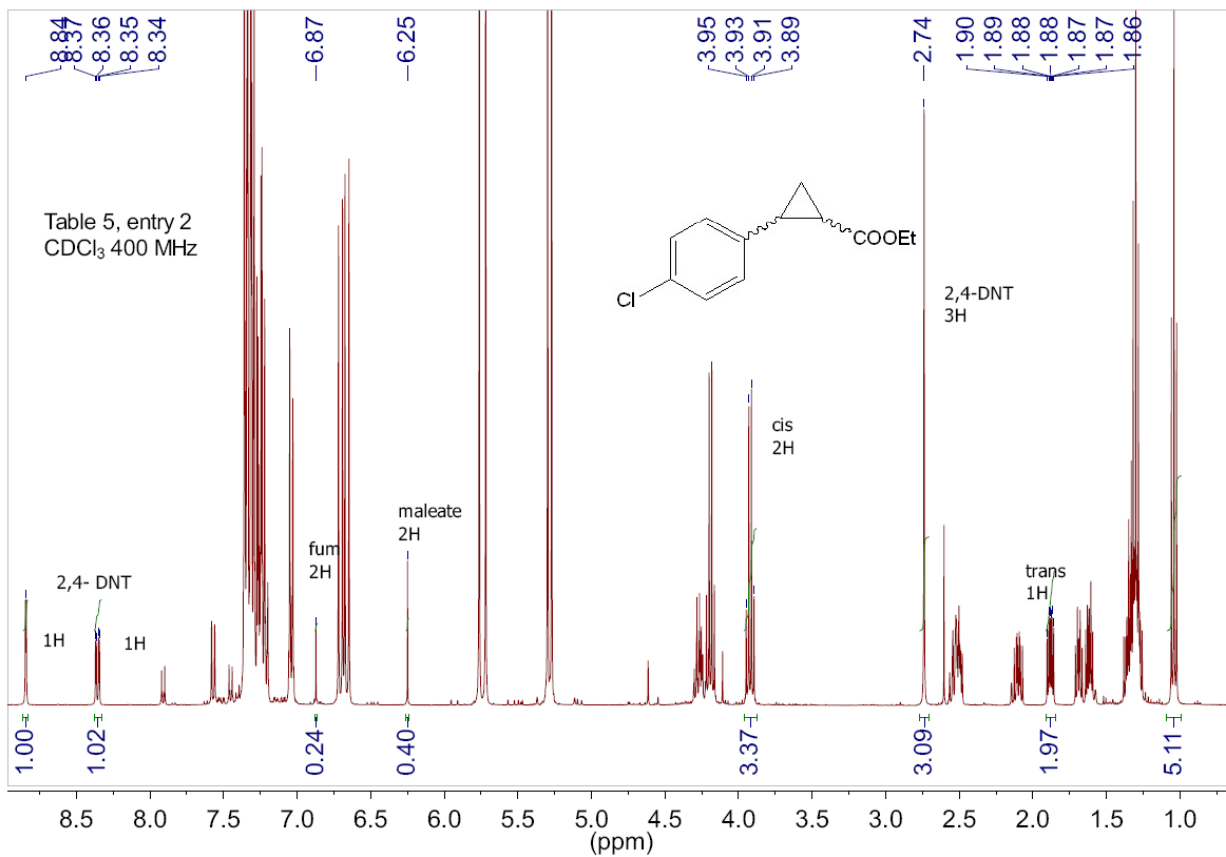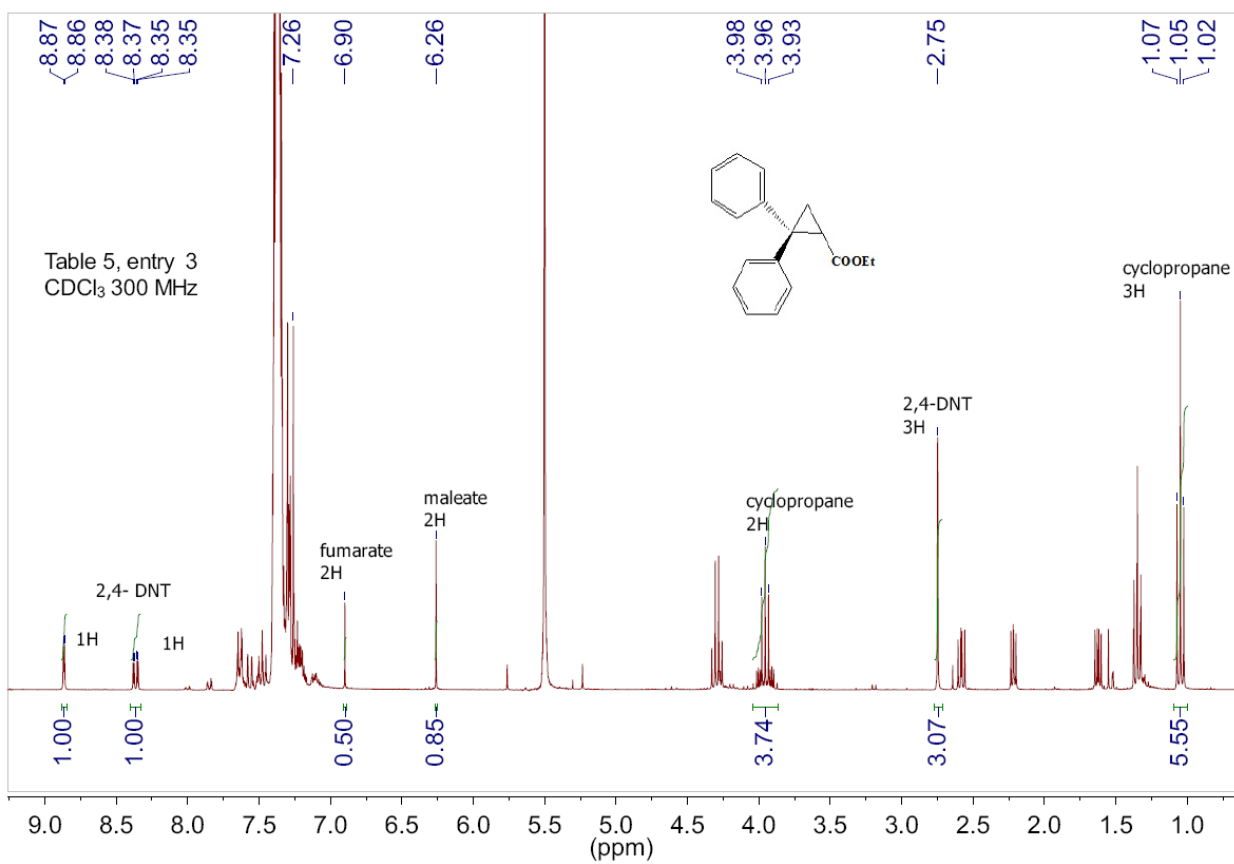

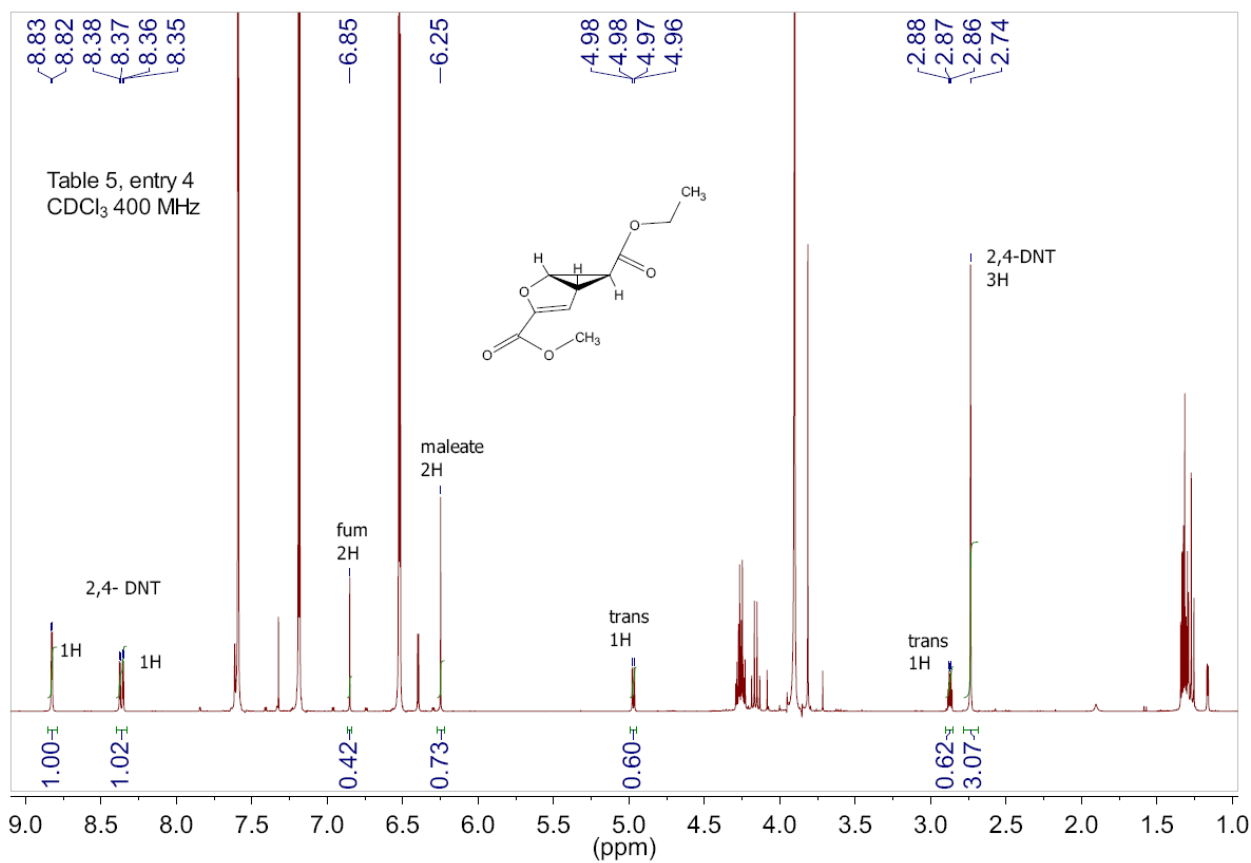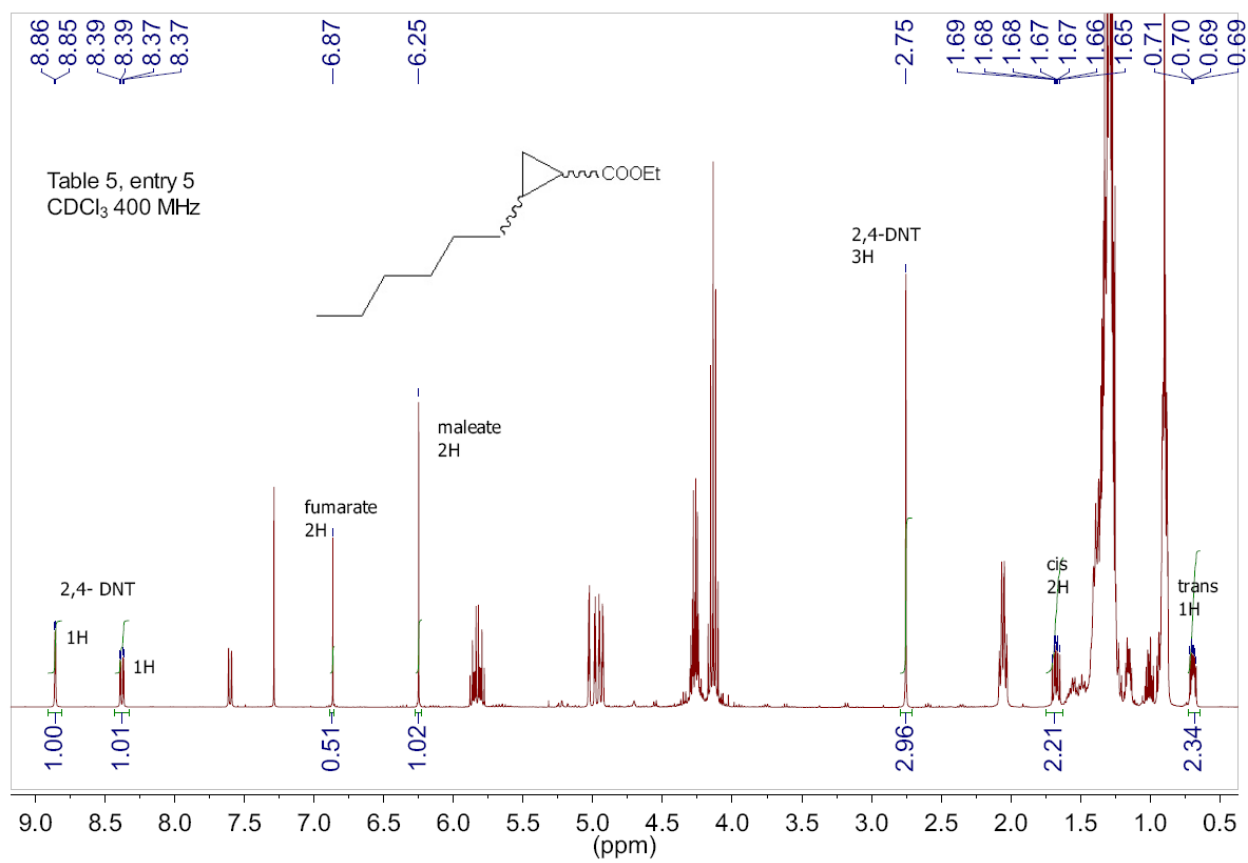

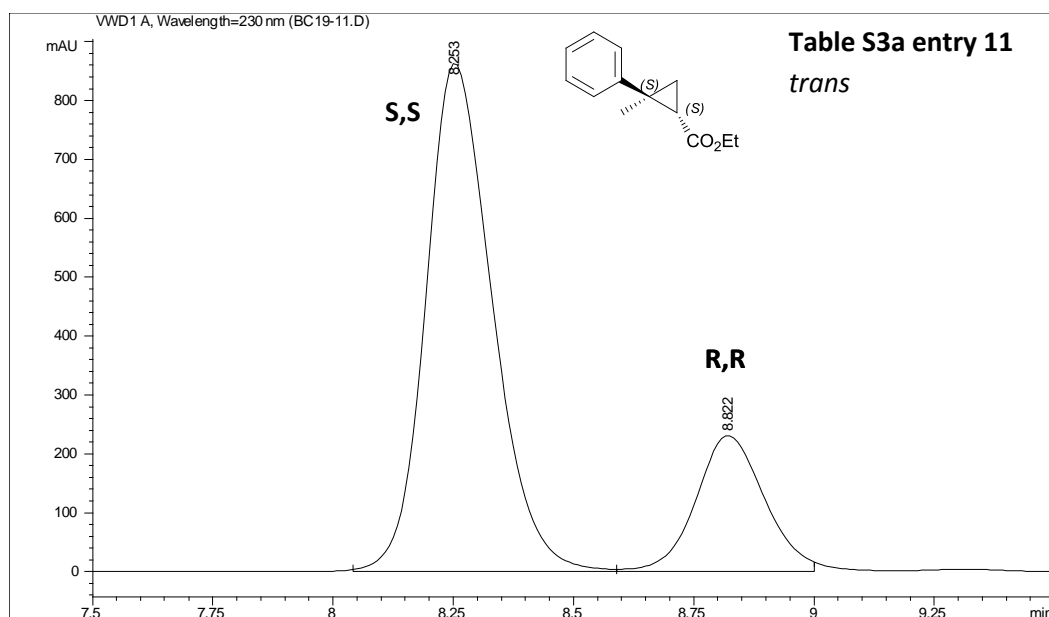

Signal 1: VWD1 A, Wavelength=230 nm

| Peak # | RetTime [min] | Type | Width [min] | Area [mAU*s] | Height [mAU] | Area %  |
|--------|---------------|------|-------------|--------------|--------------|---------|
| 1      | 8.253         | BV   | 0.1465      | 8188.98730   | 862.73212    | 82.8398 |
| 2      | 8.822         | VBA  | 0.1544      | 1696.34167   | 230.14224    | 17.1602 |

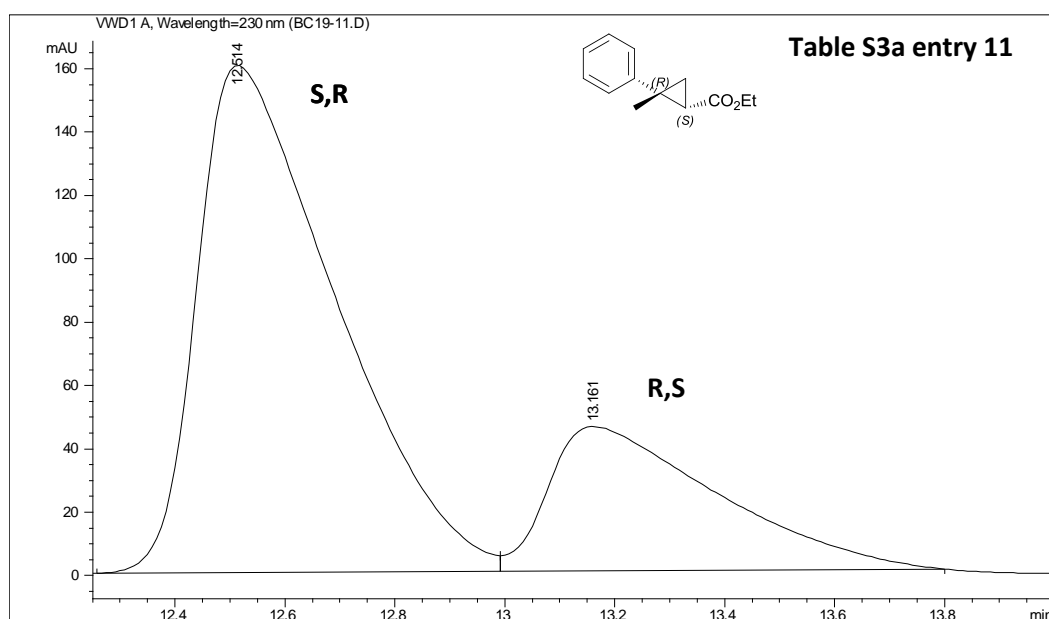

Signal 1: VWD1 A, Wavelength=230 nm

| Peak # | RetTime [min] | Type | Width [min] | Area [mAU*s] | Height [mAU] | Area %  |
|--------|---------------|------|-------------|--------------|--------------|---------|
| 1      | 12.514        | PV   | 0.2607      | 2803.21631   | 159.08958    | 77.9257 |
| 2      | 13.161        | VBA  | 0.6884      | 794.07599    | 40.98441     | 22.0743 |

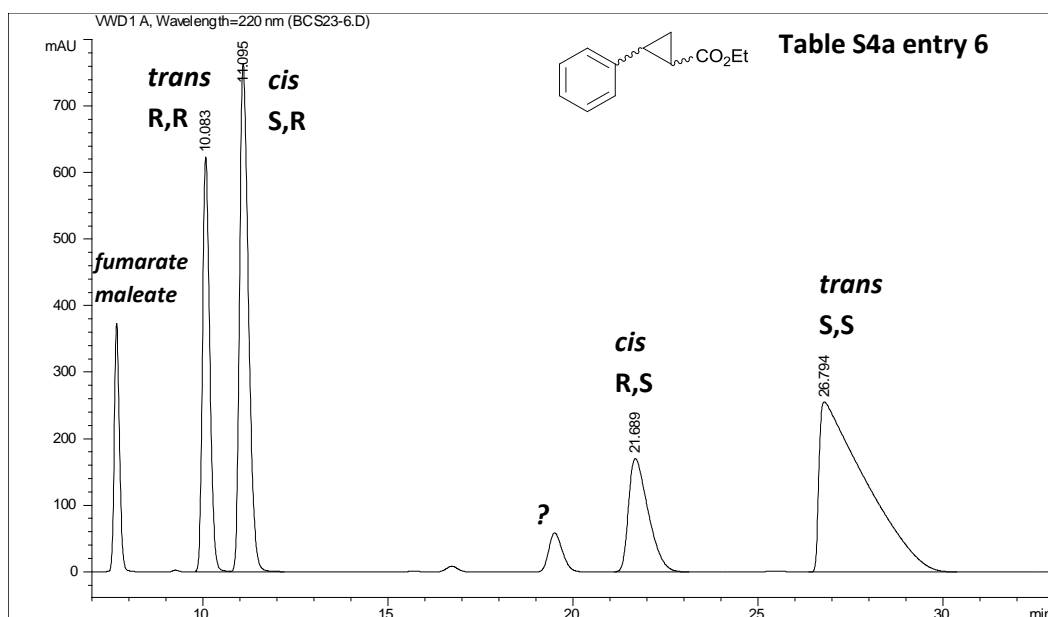

Signal 1: VWD1 A, Wavelength=220 nm

| Peak # | RetTime [min] | Type | Width [min] | Area [mAU*s] | Height [mAU] | Area %  |
|--------|---------------|------|-------------|--------------|--------------|---------|
| 1      | 10.083        | MM   | 0.1987      | 6762.06689   | 567.23120    | 15.1572 |
| 2      | 11.095        | MM   | 0.2808      | 1.28914e4    | 765.16040    | 28.8961 |
| 3      | 21.688        | MM   | 0.4086      | 2695.27832   | 109.94267    | 6.0415  |
| 4      | 26.791        | BB   | 1.1475      | 2.22643e4    | 255.90244    | 49.9053 |

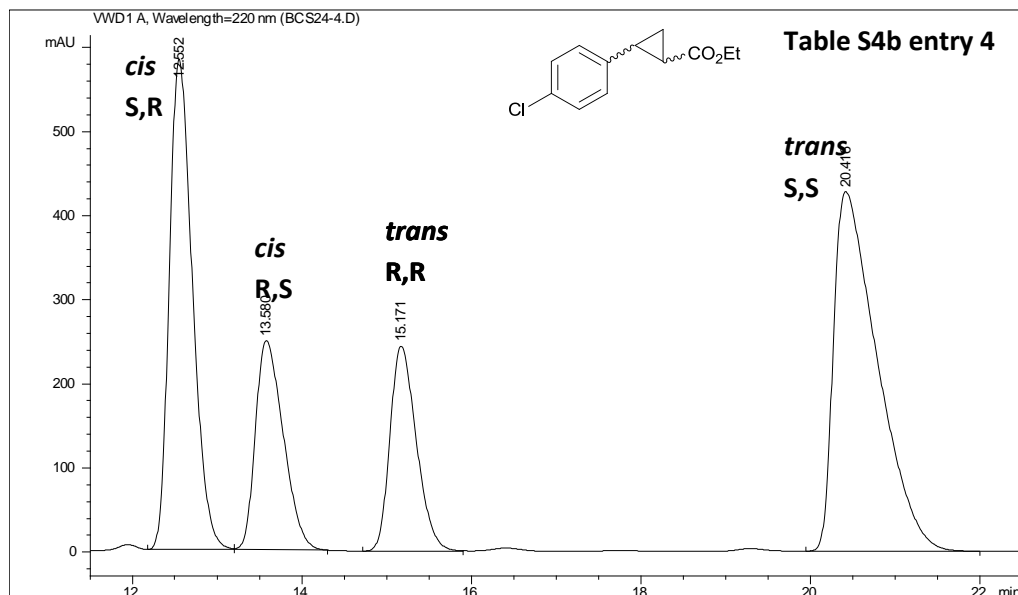

Signal 1: VWD1 A, Wavelength=220 nm

| Peak # | RetTime [min] | Type | Width [min] | Area [mAU*s] | Height [mAU] | Area %  |
|--------|---------------|------|-------------|--------------|--------------|---------|
| 1      | 12.552        | PV   | 0.2937      | 1.10495e4    | 582.71674    | 33.0939 |
| 2      | 13.580        | VBA  | 0.3095      | 4541.09814   | 247.01970    | 13.6008 |
| 3      | 15.171        | BBA  | 0.2705      | 2494.49854   | 243.77048    | 7.4712  |
| 4      | 20.416        | BPA  | 0.5325      | 1.53033e4    | 427.60849    | 45.8341 |

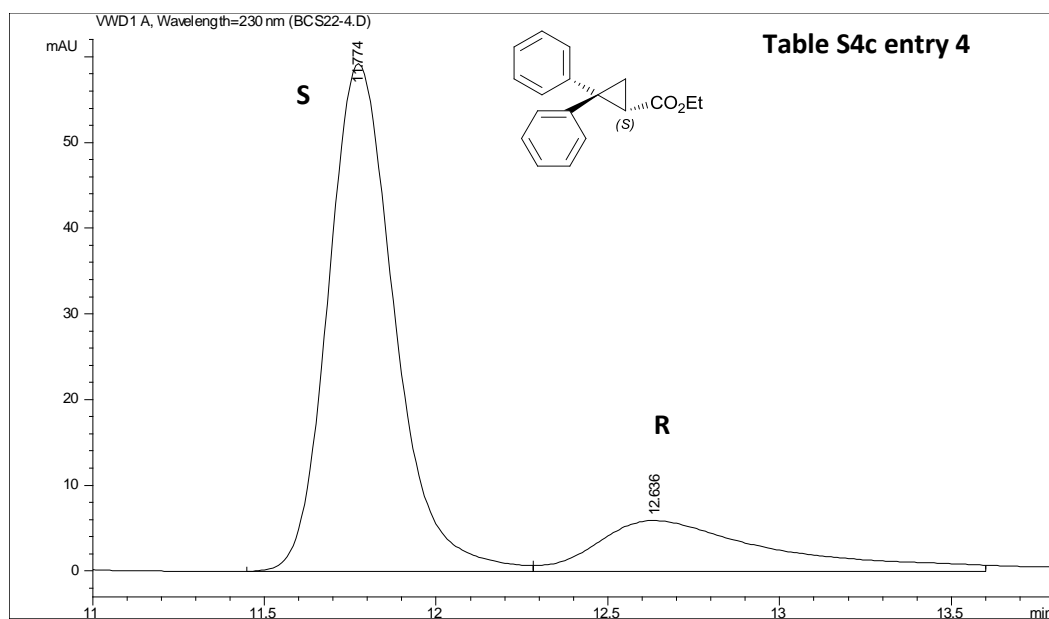

Signal 1: VWD1 A, Wavelength=230 nm

| Peak # | RetTime [min] | Type | Width [min] | Area [mAU*s] | Height [mAU] | Area %  |
|--------|---------------|------|-------------|--------------|--------------|---------|
| 1      | 11.774        | BV   | 0.2067      | 795.80957    | 59.25520     | 86.2357 |
| 2      | 12.636        | VBA  | 0.3140      | 127.02103    | 5.95084      | 13.7643 |

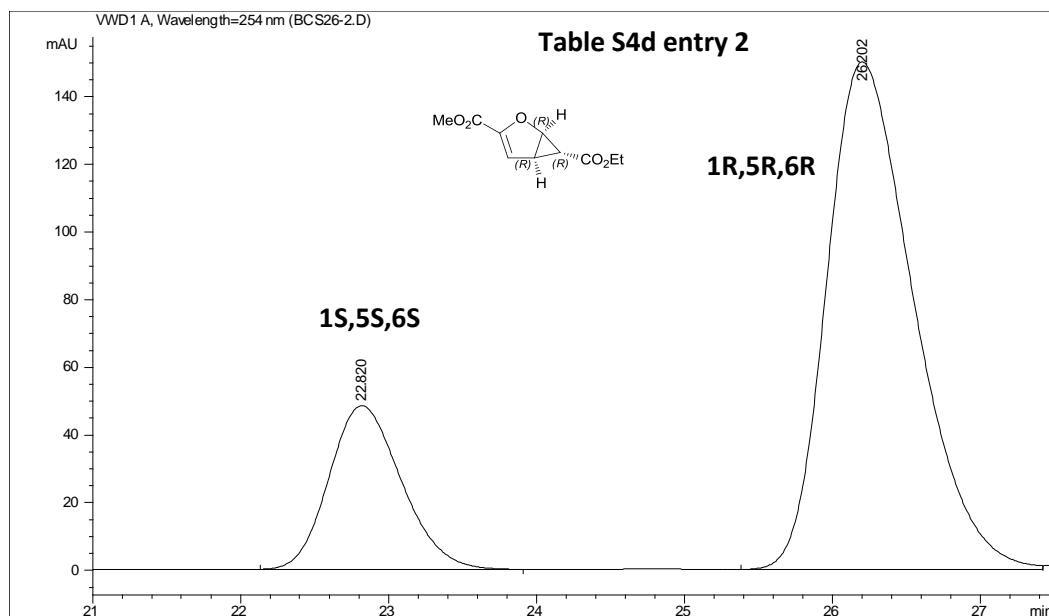

Signal 1: VWD1 A, Wavelength=254 nm

| Peak # | RetTime [min] | Type | Width [min] | Area [mAU*s] | Height [mAU] | Area %  |
|--------|---------------|------|-------------|--------------|--------------|---------|
| 1      | 22.820        | BBA  | 0.4114      | 1195.53821   | 48.42975     | 16.3399 |
| 2      | 26.202        | BV   | 0.6283      | 6121.13330   | 150.07933    | 83.6601 |

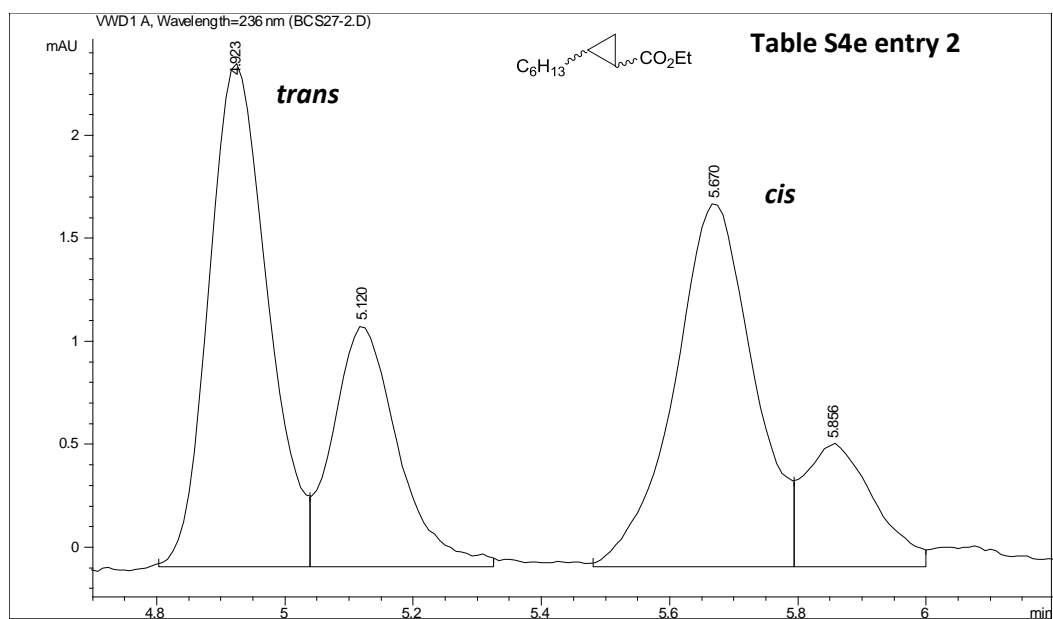

Signal 1: VWD1 A, Wavelength=236 nm

| Peak # | RetTime [min] | Type | Width [min] | Area [mAU*s] | Height [mAU] | Area %  |
|--------|---------------|------|-------------|--------------|--------------|---------|
| 1      | 4.923         | BV   | 0.1106      | 16.45330     | 2.47873      | 40.4158 |
| 2      | 5.120         | VB   | 0.0923      | 6.67279      | 1.20476      | 16.3910 |
| 3      | 5.670         | BV   | 0.1435      | 15.15985     | 1.76023      | 37.2386 |
| 4      | 5.856         | VBA  | 0.0699      | 2.42410      | 5.77861e-1   | 5.9545  |

## References

1. Commercial EDA contains CH<sub>2</sub>Cl<sub>2</sub>; a 92 wt% purity was determined on the basis of <sup>1</sup>H NMR analysis in CDCl<sub>3</sub>.
2. T. Martin, A. Galarneau, F. Di Renzo, F. Fajula and D. Plee, *Angew. Chem. Int. Ed.*, 2002, **41**, 2590-2592.
3. A. Caselli, F. Cesana, E. Gallo, N. Casati, P. Macchi, M. Sisti, G. Celentano and S. Cenini, *Dalton Trans.*, 2008, 4202-4205.
4. B. Castano, S. Guidone, E. Gallo, F. Ragaini, N. Casati, P. Macchi, M. Sisti and A. Caselli, *Dalton Trans.*, 2013, **42**, 2451-2462.
5. B. Castano, P. Zardi, Y. C. Honemann, A. Galarneau, E. Gallo, R. Psaro, A. Caselli and V. D. Santo, *RSC Adv.*, 2013, **3**, 22199-22205.
6. A. Berkessel, P. Kaiser and J. Lex, *Chem. Eur. J.*, 2003, **9**, 4746-4756.
7. L. Huang, Y. Chen, G.-Y. Gao and X. P. Zhang, *J. Org. Chem.*, 2003, **68**, 8179-8184.
8. T. Niimi, T. Uchida, R. Irie and T. Katsuki, *Adv. Synth. Catal.*, 2001, **343**, 79-88.
9. C. Böhm, M. Schinnerl, C. Bubert, M. Zabel, T. Labahn, E. Parisini and O. Reiser, *Eur. J. Org. Chem.*, 2000, **2000**, 2955-2965.
10. A. G. M. Barrett, D. C. Braddock, I. Lenoir and H. Tone, *J. Org. Chem.*, 2001, **66**, 8260-8263.
